# Supplementary material for: Evidence on Article 5.3 of FCTC (Tobacco Industry Interference in tobacco control activities) in India- a Qualitative scoping study
Source: Research Square preprint supplement (doi:10.21203/rs.3.rs-54074/v2), 2020-10-15
Supplement: Supplementary file 1 [file 42e23db64caedf862b713e69.docx]

**Supplementary File - 2**

**Ranking Sheet: Perception of study participants regarding Tobacco Industry using ‘Power Ranking Methodology’.**

**Instruction:** Prioritize the below listed stakeholders as per your perception as representative of tobacco industry. Rank the stake holders from 1 to 17 such that 1 represents least representative and 17 correspond to most representative of tobacco industry.

| **SN** | **Stakeholders** | **Rank/Score** |
| --- | --- | --- |
|  | Wholesaler |  |
|  | Government without tobacco stocks |  |
|  | PR Company |  |
|  | Manufacturer |  |
|  | Vendors |  |
|  | Pension funds and other financial incentive schemes |  |
|  | Banks and financial institutions |  |
|  | Tobacco union workers |  |
|  | Government with tobacco stocks |  |
|  | Politicians |  |
|  | Advertisers |  |
|  | Farmers corporations |  |
|  | Bureaucrats |  |
|  | Bidi rollers |  |
|  | Farmers |  |
|  | Civil Society Organization |  |
|  | Hospitality Industry |  |
